# Supplementary material
Source: PubMed Central journal article supplement (PMC1156983)

**A**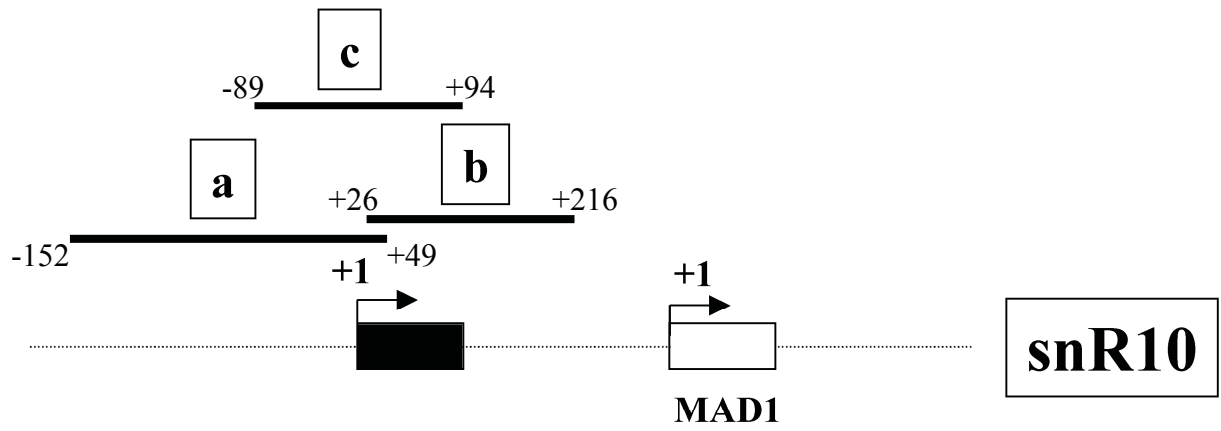**B**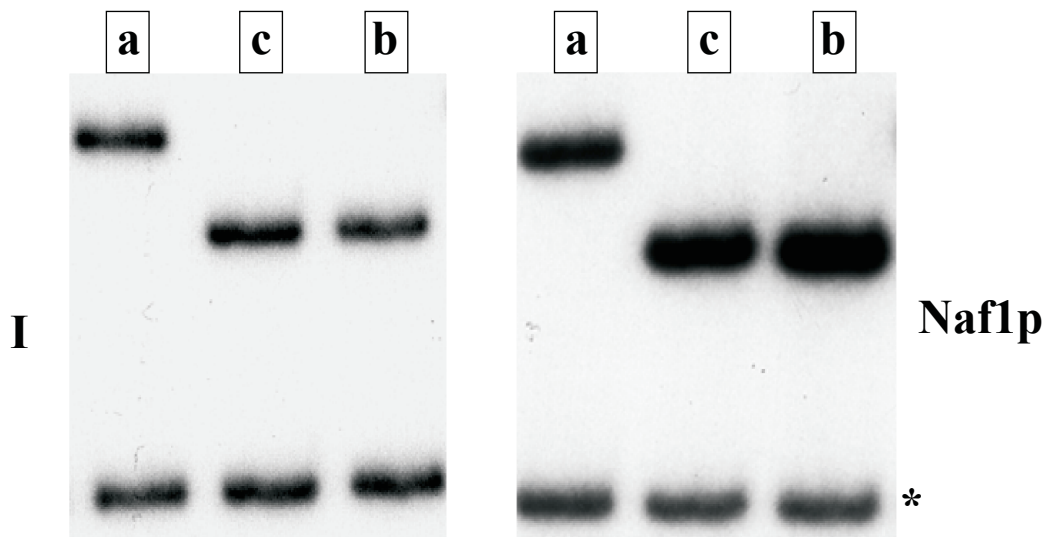**C**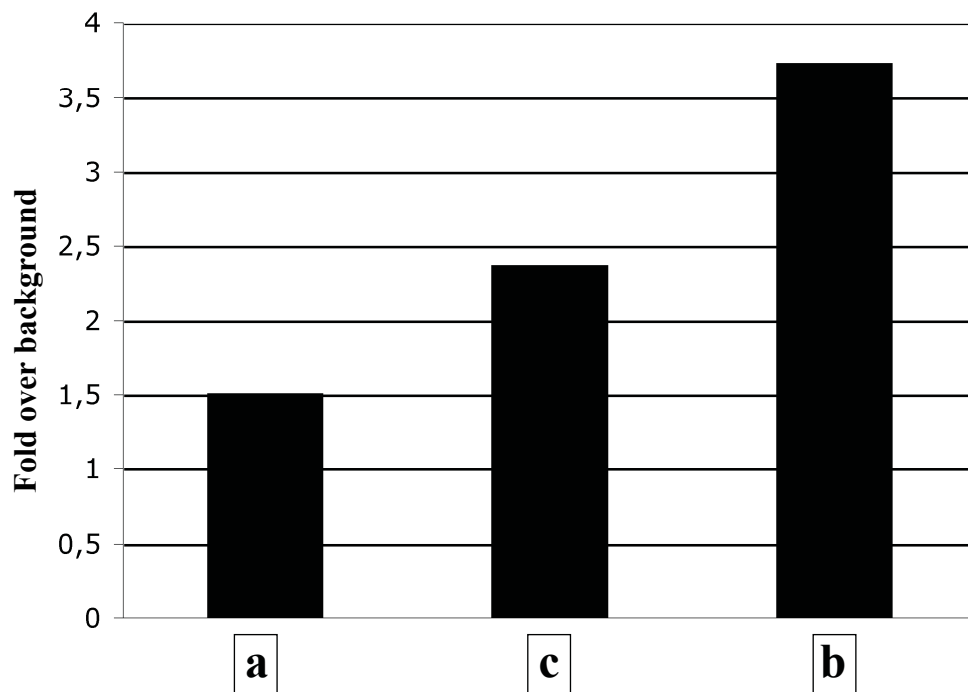

Supplement: molcellb_25_13_5396__1.pdf [file molcellb_25_13_5396__1.pdf]
